# Supplementary material
Source: PubMed Central journal article supplement (PMC2659527)

FIGURE 1S

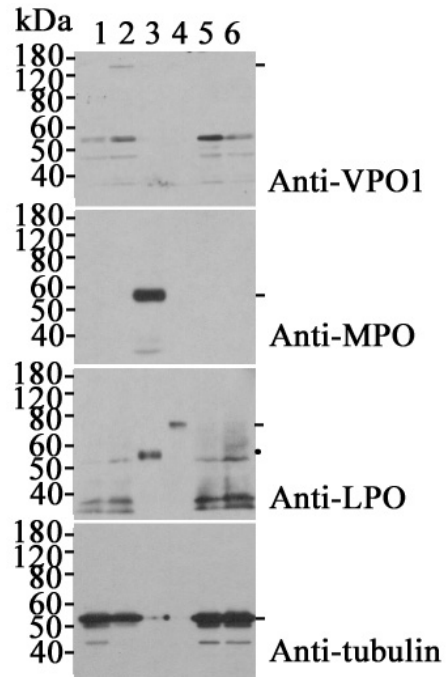

Supplement: NIHMS83941-supplement-01.pdf [file NIHMS83941-supplement-01.pdf]
